# Supplementary material for: Primary therapy and survival in patients over 70 years old with primary central nervous system lymphoma: a contemporary, nationwide, population-based study in the Netherlands
Source: PubMed Central journal article supplement — Haematologica. 2020 Apr 2;106(2):597–600. doi: 10.3324/haematol.2020.247536 (PMC7849552; doi:10.3324/haematol.2020.247536), 2020-04-02
Supplement: 2020_247536-Disclosures_Contributions.pdf [file 2020_247536-Disclosures_Contributions.pdf]

Haematologica  
HAEMATOL/2020/247536  
Version 3

Primary therapy and survival in patients aged over 70-years-old with primary central nervous system lymphoma: a contemporary, nationwide, population-based study in the Netherlands

Matthijs van der Meulen, Jacoline E.C. Bromberg, Marcel Nijland, Otto Visser, Jeanette K. Doorduijn, and Avinash G. Dinmohamed

Disclosures: The authors have no conflict of interest to disclose.

Contributions: JECB and AGD designed the study; AGD analyzed the data; OV collected the data; MvdM wrote the manuscript with contributions from JECB, MN, OV, JKD, and AGD; and all authors interpreted the data, and read, commented on, and approved the final version of the manuscript.
